# Supplementary material for: An all-weather Li/LiV2(PO4)3 primary battery with improved shelf-life based on the in situ modification of the cathode/electrolyte interface
Source: Royal Society of Chemistry journal article supplement (doi:10.1039/d0ta05871h), 2020-01-01
Supplement: d0ta05871h1.pdf [file d0ta05871h1.pdf]

## Supporting Information

### **Title: All-Weather Li/LiV<sub>2</sub>(PO<sub>4</sub>)<sub>3</sub> Primary Battery with Improved Shelf-life: Based on the In-situ Modification of Cathode/Electrolyte Interface**

Di Ma,<sup>‡a</sup> Zihan Song,<sup>‡ab</sup> Hongzhang Zhang,<sup>\*a</sup> Arshad Hussain,<sup>ab</sup> Kai Feng,<sup>c</sup> Huamin Zhang<sup>a</sup> and  
Xianfeng Li<sup>\*a</sup>

---

<sup>a</sup> Division of Energy Storage, Dalian Institute of Chemical Physics, Chinese Academy of Sciences, Zhongshan Road 457, Dalian 116023,  
China. E-mail: [zhanghz@dicp.ac.cn](mailto:zhanghz@dicp.ac.cn); [lixianfeng@dicp.ac.cn](mailto:lixianfeng@dicp.ac.cn)

<sup>b</sup> University of Chinese Academy of Sciences, Beijing 100049, China

<sup>c</sup> Shandong Collaborative Innovation Center of Light Hydrocarbon Transformation and Utilization, College of Chemistry & Engineering,  
Yantai University, Yantai, 264005, China

<sup>†</sup>Electronic Supplementary Information (ESI) available. See DOI:

<sup>‡</sup>The first two authors contribute equally.

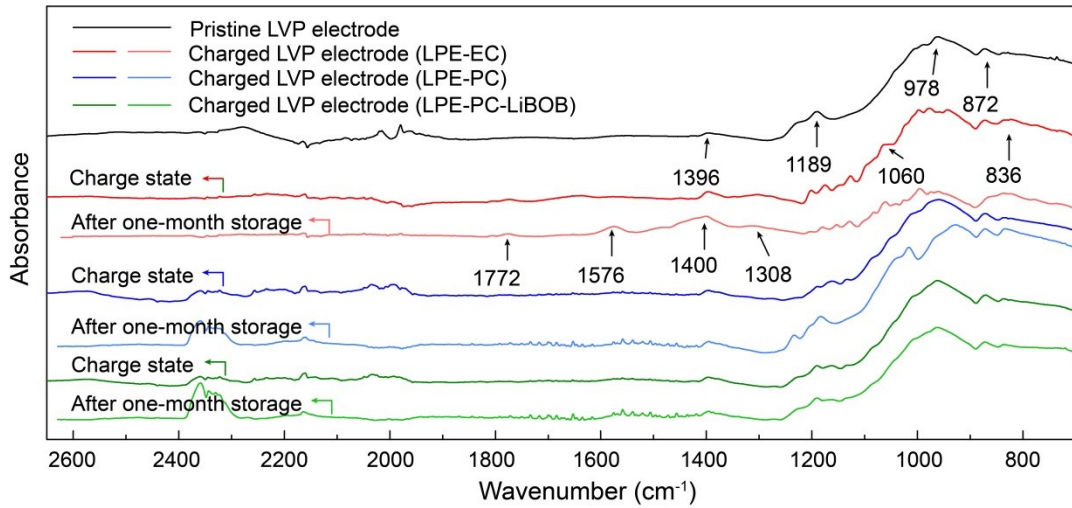

Figure S1. FT-IR spectra of  $\text{LiV}_2(\text{PO}_4)_3$  cathodes in  $\text{Li}/\text{LiV}_2(\text{PO}_4)_3$  primary batteries with LPE-EC, LPE-PC and LPE-PC-LiBOB electrolytes before and after one-month storage.

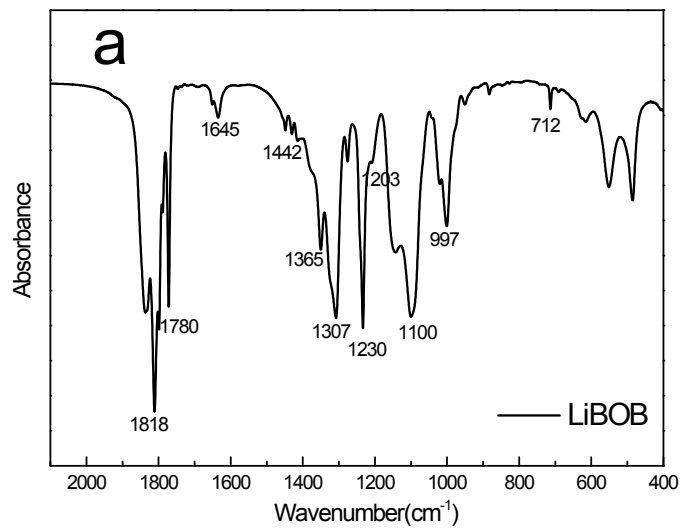

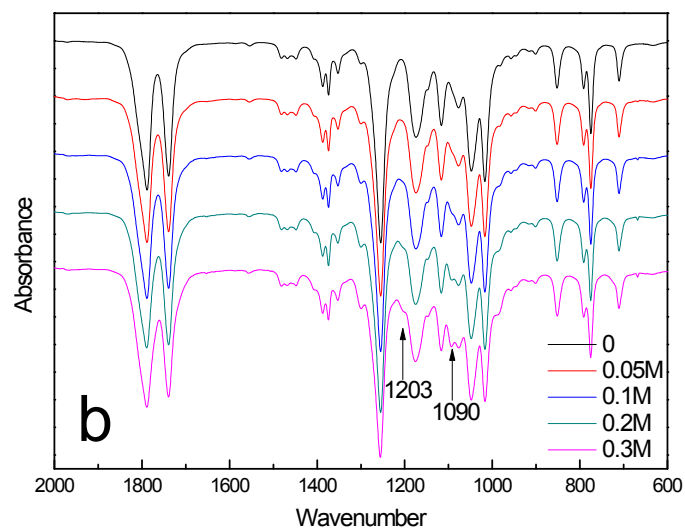

Figure S2. FT-IR spectrum of (a) LiBOB and (b) different concentrations LiBOB in PC/DEC

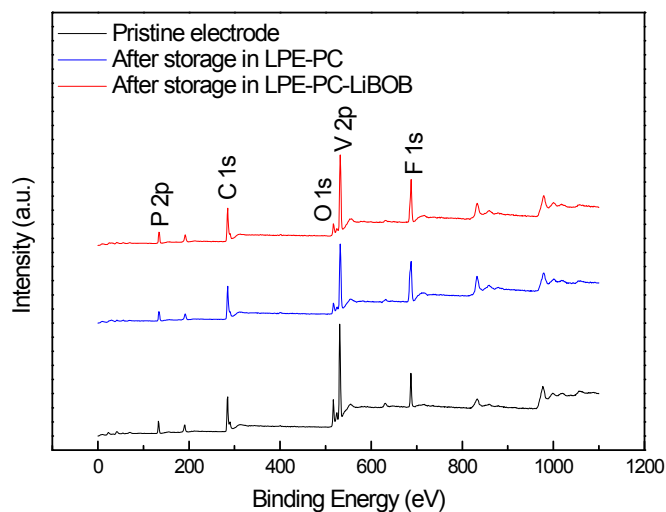

Figure S3. XPS spectrums of  $\text{Li}_3\text{V}_2(\text{PO}_4)_3$  cathodes in Li/  $\text{LiV}_2(\text{PO}_4)_3$  primary batteries with LPE-PC and LPE-PC-LiBOB electrolytes compared with pristine cathode
